# Supplementary material for: Morphological Characteristics of Elite International Soccer Referees: Somatotype and Bioelectrical Impedance Vector Analysis
Source: MDPI journal article supplement (doi:10.3390/jfmk8030100), 2023-07-24
Supplement: s1 [file s1]

## Supplementary Material

**Figure S1.** Somatotype of male elite international soccer referees, according to geographical origin.

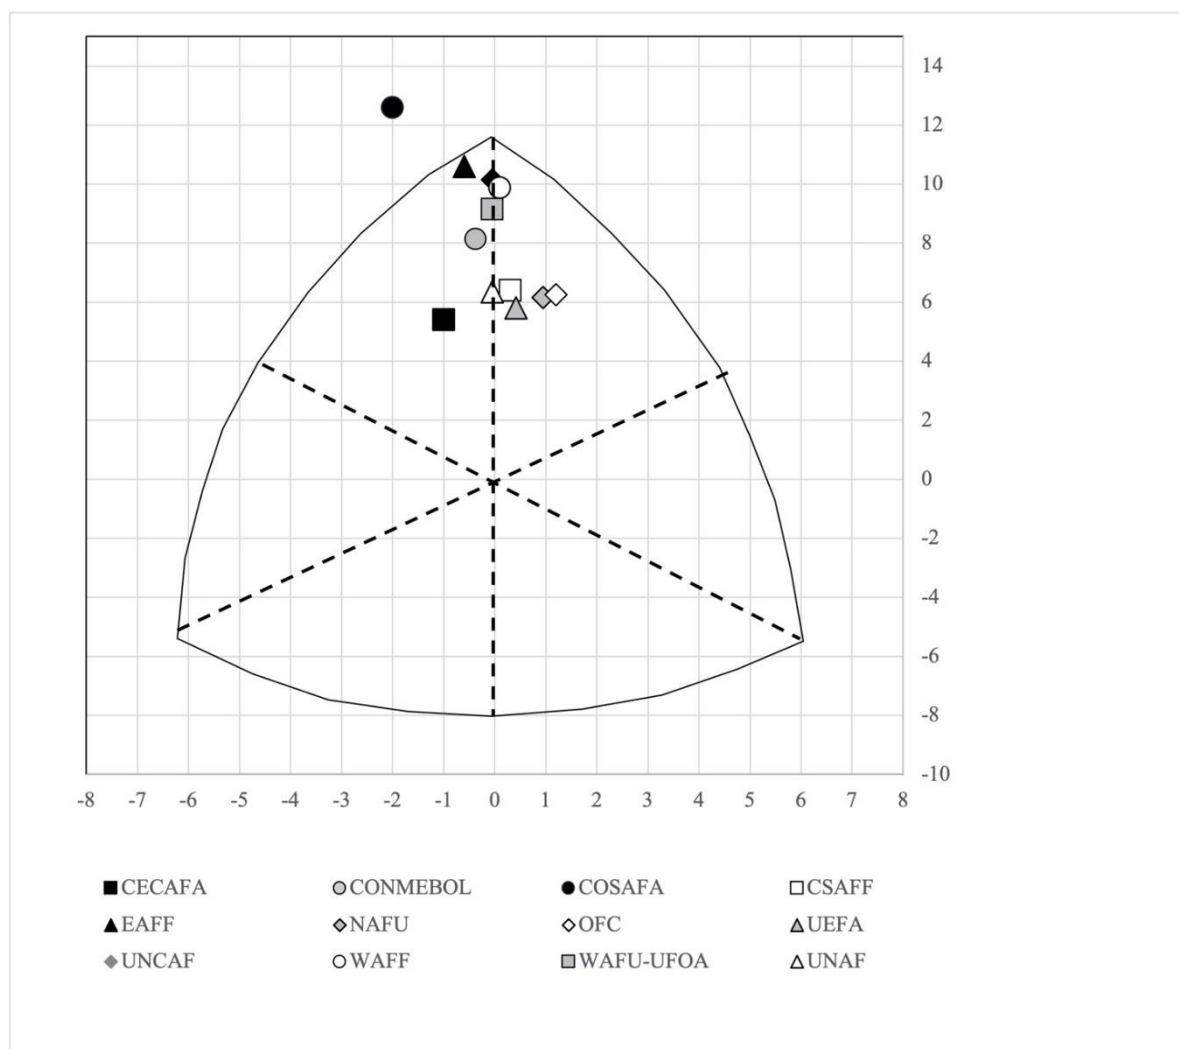

**Figure S1.** CECAFA = Central and East Africa Football Associations; CSAFF = [16:12] Council for East and Central Africa Football Associations; UEFA = Union of European Football association; UNAF = Union of North African Football Federations; EAFF = East Asian Football Federation; UNCAF = Unión Centroamericana de Fútbol; CONMEBOL = Confederación sudamericana de Fútbol; NAFU = North American Football Union; WAFF = West Asian Football Federation; COSAFA = Council of Southern Africa Football Associations; OFC = Oceania Football Confederation; WAFU-UFOA = West Africa Football Union;

**Figure S2.** Bioelectrical impedance vector of male elite international soccer referees, according to geographical origin.

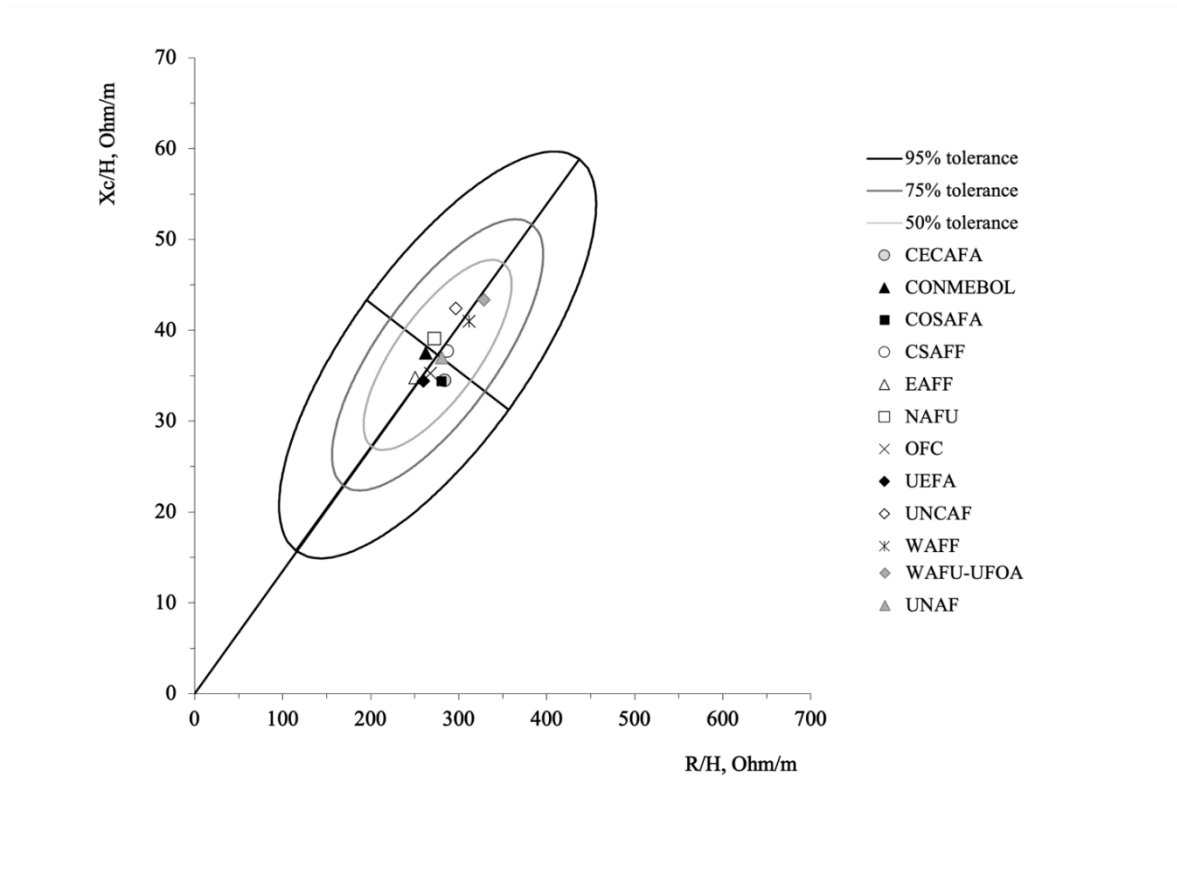

**Figure S2.** CECAFA = Central and East Africa Football Associations; CSAFF = [16:12] Council for East and Central Africa Football Associations; UEFA = Union of European Football association; UNAF = Union of North African Football Federations; EAFF = East Asian Football Federation; UNCAF = Unión Centroamericana de Fútbol; CONMEBOL = Confederación sudamericana de Fútbol; NAFU = North American Football Union; WAFF = West Asian Football Federation; COSAFA = Council of Southern Africa Football Associations; OFC = Oceania Football Confederation; WAFU-UFOA = West Africa Football Union;
